# Supplementary material
Source: PubMed Central journal article supplement (PMC3539244)
Supplement: NIHMS418112-supplement-01.pdf [file NIHMS418112-supplement-01.pdf]

**Supplementary material for:**

**Hijacking membrane transporters for arsenic phytoextraction**

Melissa S. LeBlanc, Elizabeth C. McKinney, Richard B. Meagher, and Aaron P. Smith

**Fig. S1.** Arsenate phenotypes of transgenic *Arabidopsis* plants overexpressing *PHT* and/or *YCF1*. Wild-type (WT) and homozygous transgenic lines were grown on 150  $\mu$ M sodium arsenate for 30 days. Average fresh weights of roots, shoots, or whole seedlings are shown normalized to the weights in the corresponding tissue from WT. Error bars indicate standard deviation,  $n > 60$ .

**Fig. S2.** Seedling morphology of transgenic *Arabidopsis* plants overexpressing *PHT* and/or *YCF1* transgenes. Plants were grown on plates in the presence (right) or absence (left) of 150  $\mu$ M sodium arsenate (AsV) for 21 days.

**Fig. S3.** *PHT*-overexpression does not confer sensitivity to arsenite. The average seedling fresh weights of wild-type (WT) and *PHT1*- or *PHT7*-overexpression plants grown on 25  $\mu$ M sodium arsenite for 21 days were quantified. Error bars indicate standard deviation,  $n > 25$ .

**Fig. S4.** Glutathione depletion phenocopies the arsenate-sensitivity of *PHT1ox* and *PHT7ox* plants in *PHToxYCF1ox* co-expressors. Root elongation was quantified for 7-day-old wild-type (WT) and transgenic plants grown for 5 days in the presence of 150  $\mu$ M sodium arsenate (left) or 150  $\mu$ M sodium arsenate and 500  $\mu$ M BSO (right). Black dots mark the location of seedling root tips at the time of transfer from control media to media containing arsenate or arsenate and BSO.

**Table S1.** Primers used in the current study.

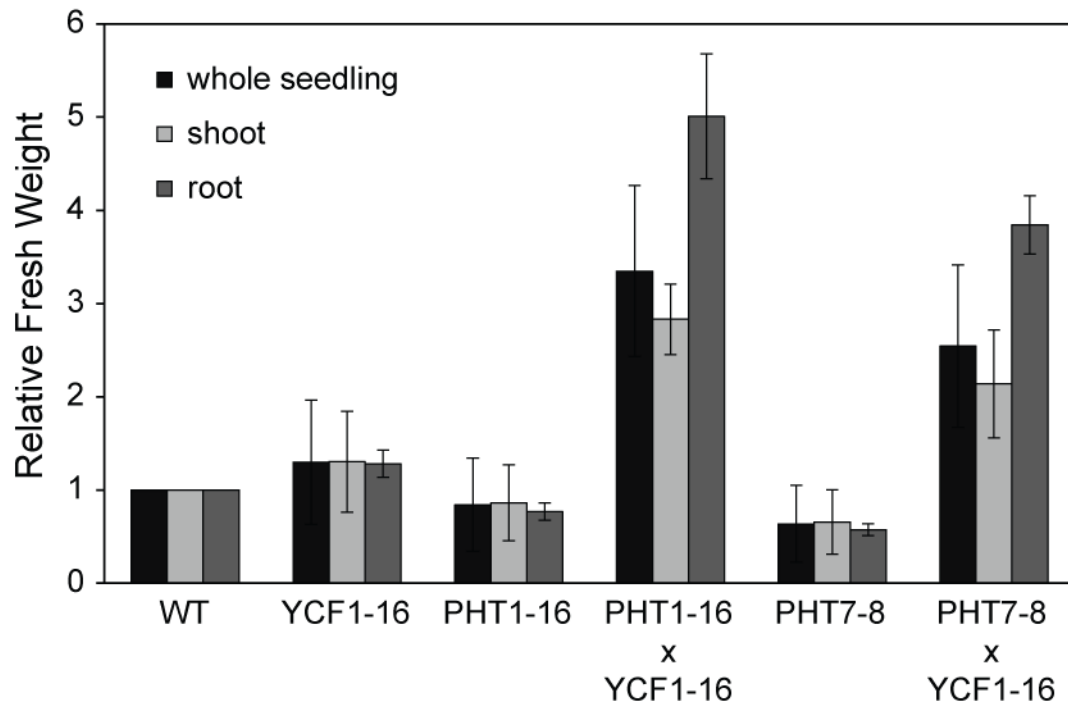

**Fig. S1.** Arsenate phenotypes of transgenic *Arabidopsis* plants overexpressing *PHT* and/or *YCF1*. Wild-type (WT) and homozygous transgenic lines were grown on 150  $\mu$ M sodium arsenate for 30 days. Average fresh weights of roots, shoots, or whole seedlings are shown normalized to the weights in the corresponding tissue from WT. Error bars indicate standard deviation,  $n > 60$ .

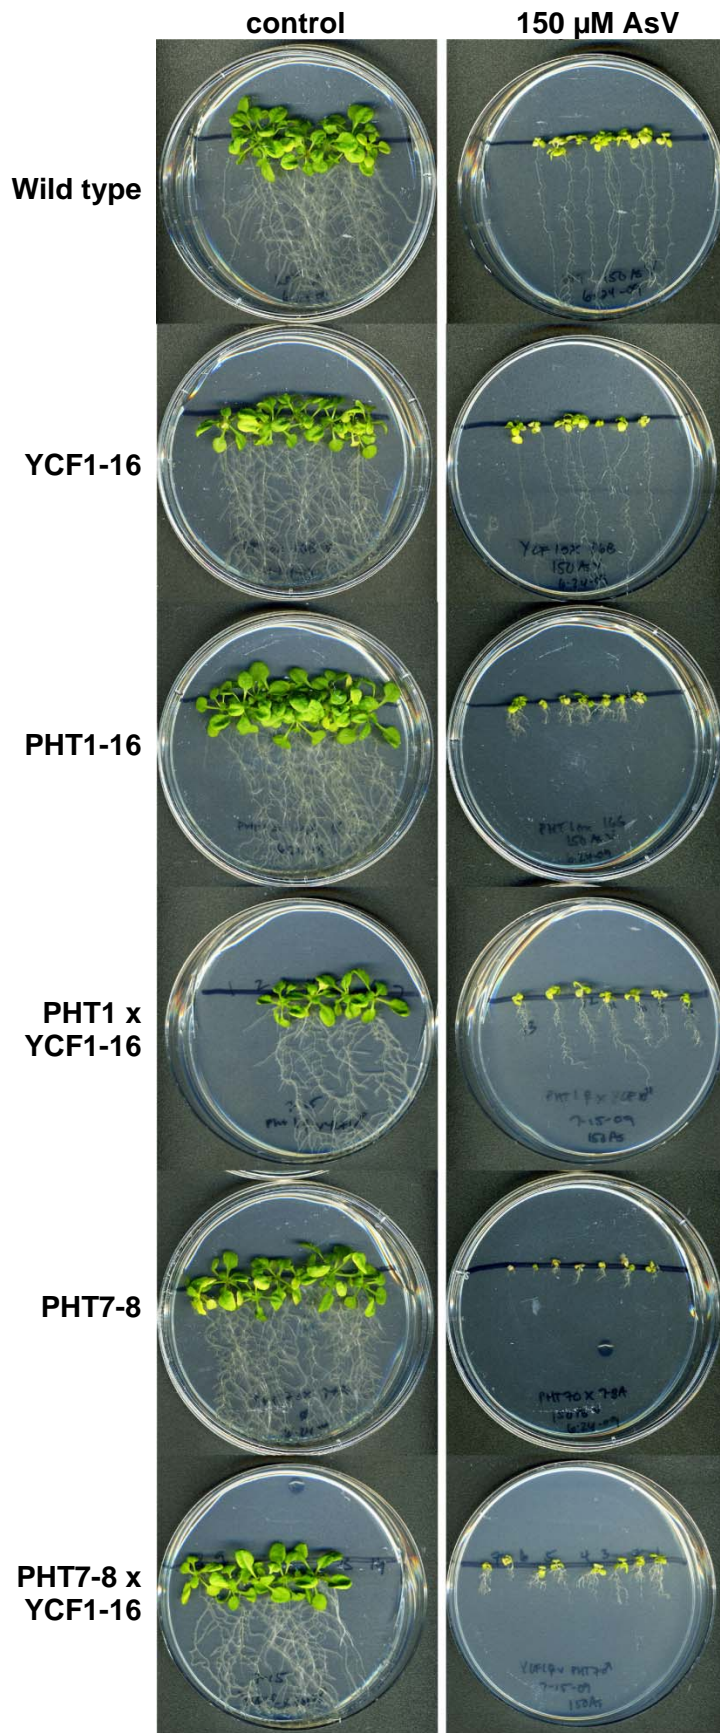

**Fig. S2.** Seedling morphology of transgenic *Arabidopsis* plants overexpressing *PHT* and/or *YCF1* transgenes. Plants were grown on plates in the presence (right) or absence (left) of 150  $\mu\text{M}$  sodium arsenate (AsV) for 3 weeks.

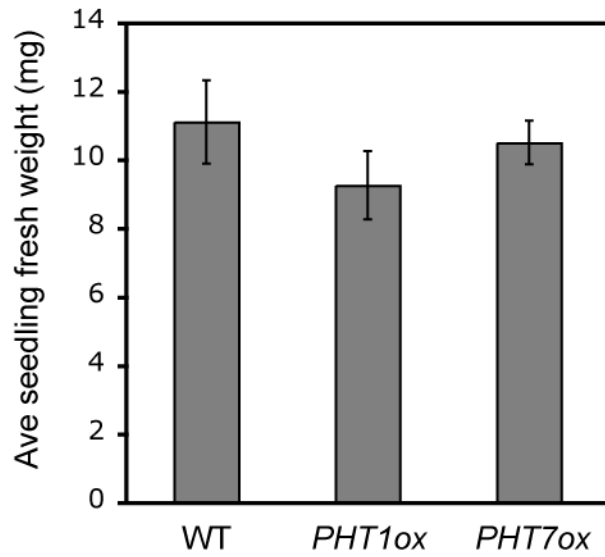

**Fig. S3.** *PHT*-overexpression does not confer sensitivity to arsenite. The average seedling fresh weights of wild-type (WT) and *PHT1*- or *PHT7*-overexpression plants grown on 25  $\mu$ M sodium arsenite for 21 days were quantified. Error bars indicate standard deviation,  $n > 25$ .

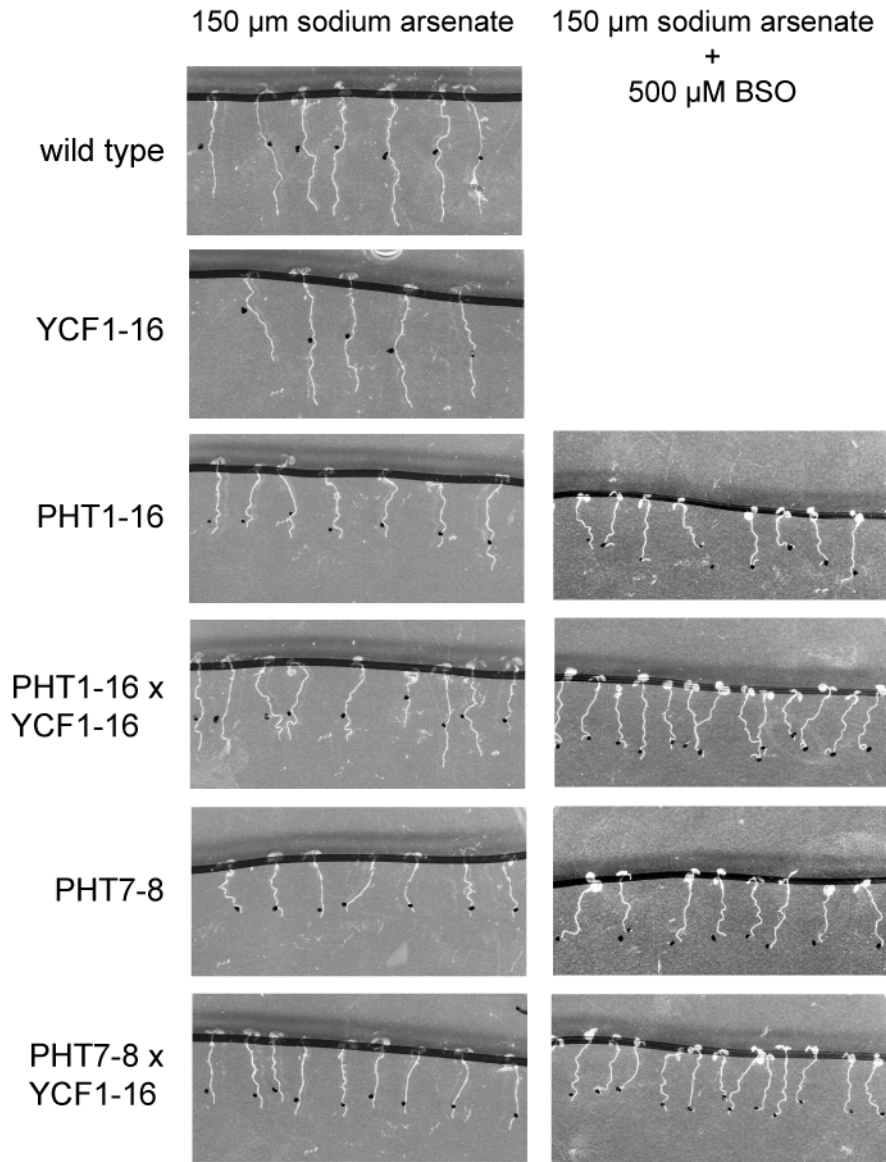

**Fig. S4.** Glutathione depletion phenocopies the arsenate-sensitivity of *PHT1ox* and *PHT7ox* plants in *PHToxYCF1ox* co-expressors. Root elongation was quantified for one-week-old wild-type (WT) and transgenic plants grown for five days in the presence of 150  $\mu$ M sodium arsenate (left) or 150  $\mu$ M sodium arsenate and 500  $\mu$ M BSO (right). Black dots mark the location of seedling root tips at the time of transfer from control media to media containing arsenate or arsenate and BSO.

**Table S1.** Primers used in the current study.

| <b>Primer</b>  | <b>Sequence (5' → 3')</b>                                                              |
|----------------|----------------------------------------------------------------------------------------|
| YCF1-XhNcIS    | tagtgactcgagccatggctggaatcttgtttcatgggcct                                              |
| YCF1-NcMutN    | accattcattatccaaggaactgtgaaacata                                                       |
| YCF1-NcMutS    | tatgtttcacaagttccttgataatgaatgg                                                        |
| YCF1-PstIN     | gtctagctgcagttgtccagctctccttcta                                                        |
| YCF1-PstIS     | tagtgactgcagaaattaaatgattggat                                                          |
| YCF1-ScBmN     | gtctaggagctcggatccttaatttcattgaccaaaccagcct                                            |
| PHT1_S1        | tacgtcggtagcccatggccgaacaacaactaggagtgcta                                              |
| PHT1_A894      | aaggagatgaagcccgtggcgtctaaggaat                                                        |
| PHT1_S863      | aattccttagacgccacgggcttcatctcct                                                        |
| PHT1_A1575noHA | tagctgtctagaaagcttttattctcgtcatggctaacct                                               |
| PHT1_flank_S   | aatacgtcggtagcccatggccga                                                               |
| PHT1_flank_A   | ttagctgtctagaaagcttttaagca                                                             |
| PHT7_S1        | tacgtcgcggccgcaatcatgagtgaggatcaactaacgtgctaacgcactcgacgtcgccaa<br>aacgcaatggtatcattca |
| PHT7_A876      | aaggccatggcgttcataaattccttgaa                                                          |
| PHT7_S845      | ttccaaggaatttatgaaacgccatggcct                                                         |
| PHT7_A1073     | aaccagtaaccaggcaccgtgctacaca                                                           |
| PHT7_S1045     | ttgtgtagcacggcctggttactggt                                                             |
| PHT7_A1608noHA | tagctggggcccgtcgacctatgcagttgacactgcgttgt                                              |
| PHT7_flank_S   | aatacgtcgcggccgcaatcatga                                                               |
| PHT7_flank_A   | tttagctggggcccgtcgacctaa                                                               |
